# Supplementary material
Source: PubMed Central journal article supplement (PMC6713991)
Supplement: ao9b01564_si_001.pdf [file ao9b01564_si_001.pdf]

**RECYCLED CELLULOSE POLYPROPYLENE COMPOSITE FEEDSTOCKS FOR  
MATERIAL EXTRUSION ADDITIVE MANUFACTURING**

*Nicole E. Zander<sup>1\*</sup>, Jay H. Park<sup>2</sup>, Zachary R. Boelter<sup>1</sup> and Margaret A. Gillan<sup>3</sup>*

*<sup>1</sup>U.S. Army Research Laboratory, Weapons and Materials Research Directorate, Aberdeen Proving  
Ground, Aberdeen, MD*

*<sup>2</sup>University of Massachusetts Lowell, Francis College of Engineering, Lowell, MA*

*<sup>3</sup>Rowan University, Henry M. Rowan College of Engineering, Glassboro, NJ*

*[\\*email: nicole.e.zander.civ@mail.mil](mailto:nicole.e.zander.civ@mail.mil); telephone: 410-306-1965*

## Supporting Information

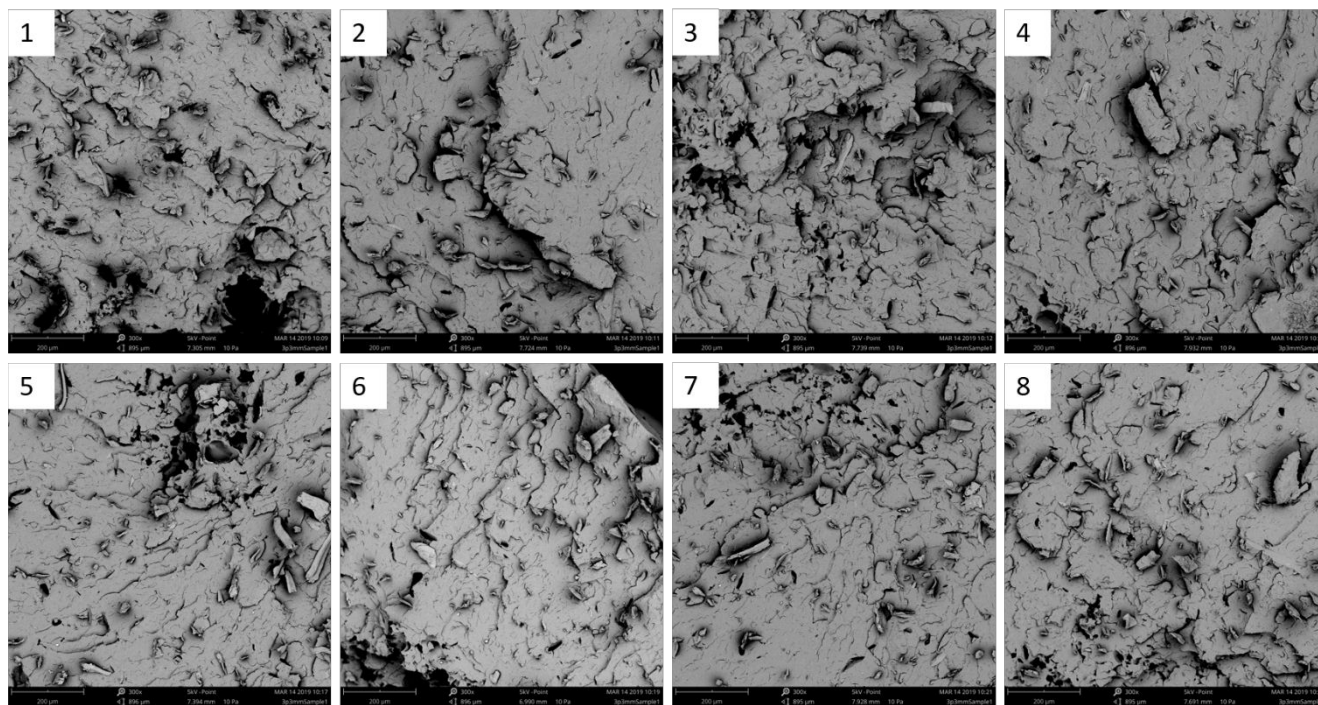

Figure S1. SEM images of cPP/ 10 wt.% CB filament cross-sections along spool (3 ft. apart)

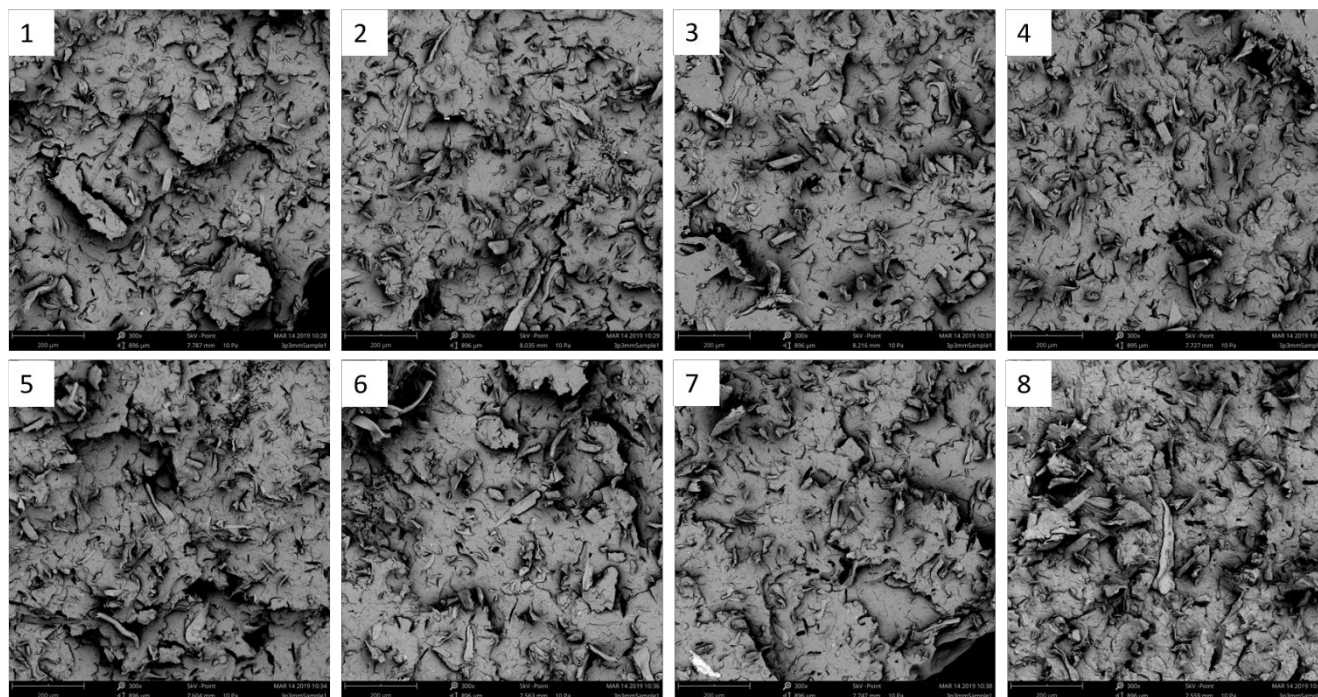

Figure S2. SEM images of rPP/ 10 wt.% CB filament cross-sections along spool (3 ft. apart)

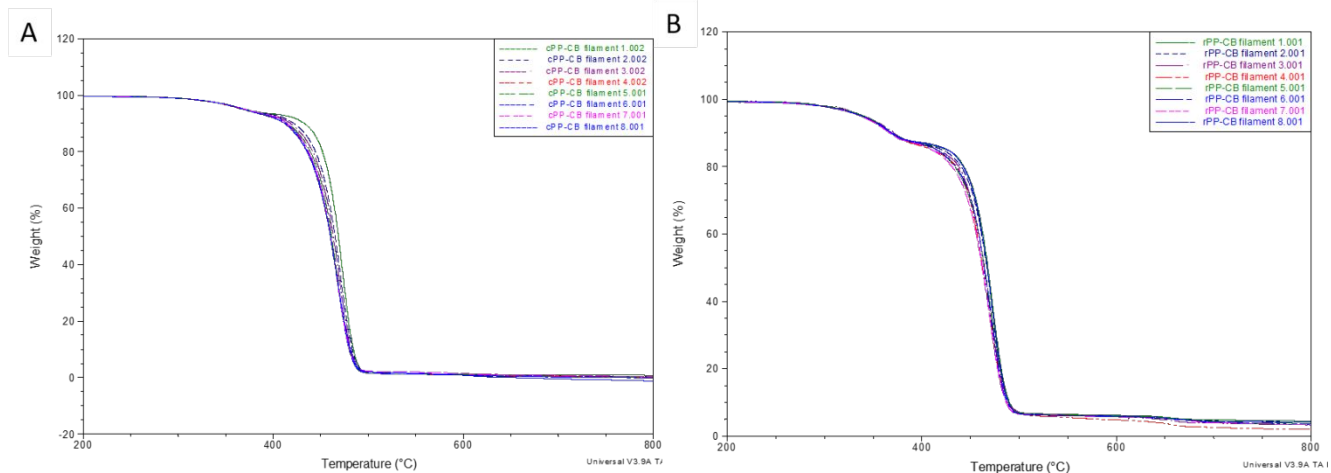

Figure S3. TGA of PP/10 wt.% CB filament along spool (3 ft. apart). (A) cPP, (B) rPP.

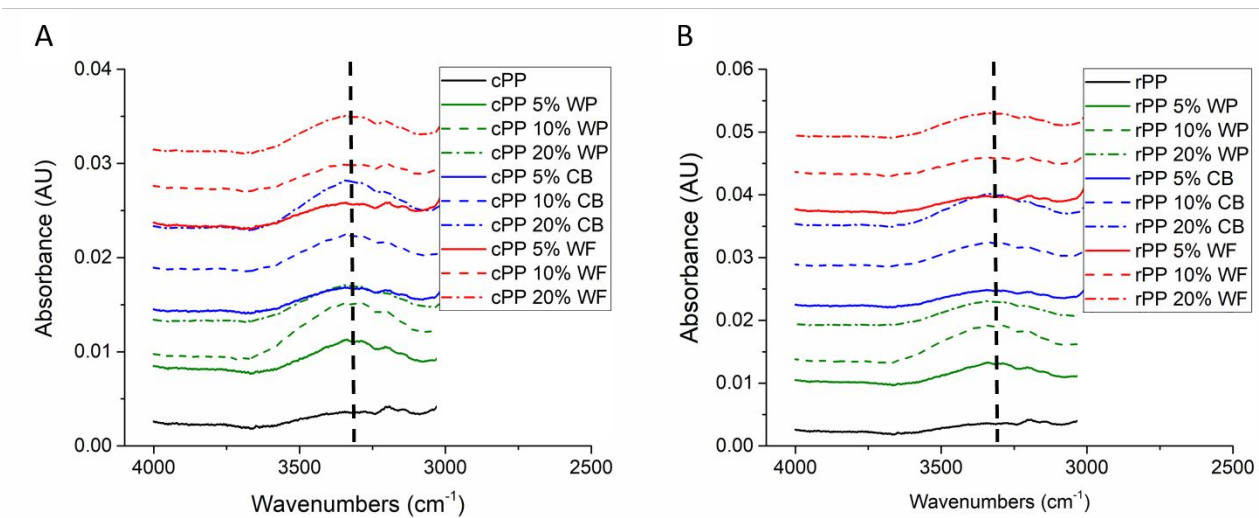

Figure S4. FTIR is printed PP/cellulose (A) cPP, (B) rPP.

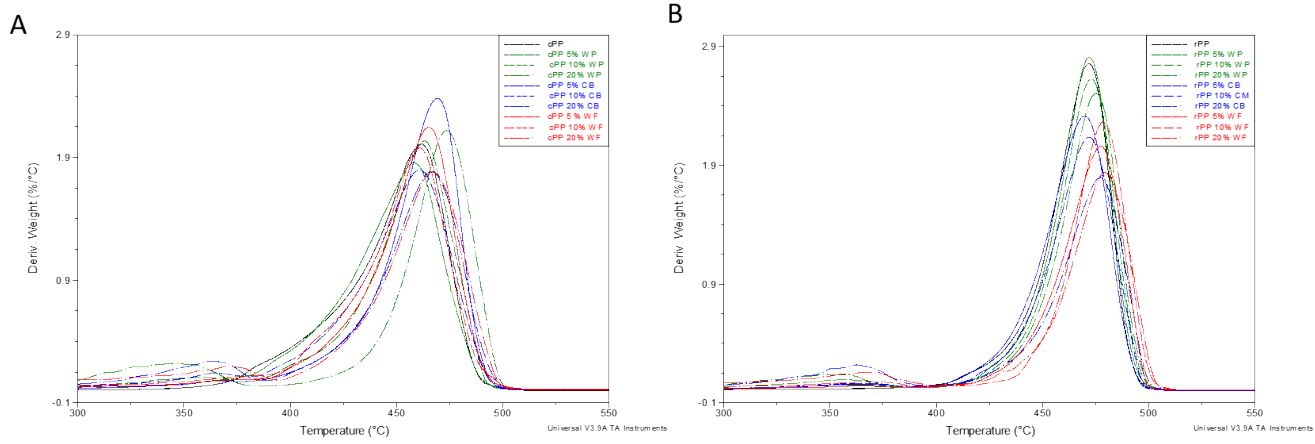

Figure S5. TGA derivative weight percent printed PP/cellulose (A) cPP, (B) rPP. Green curves = paper, blue curves = cardboard, red curves = wood flour.

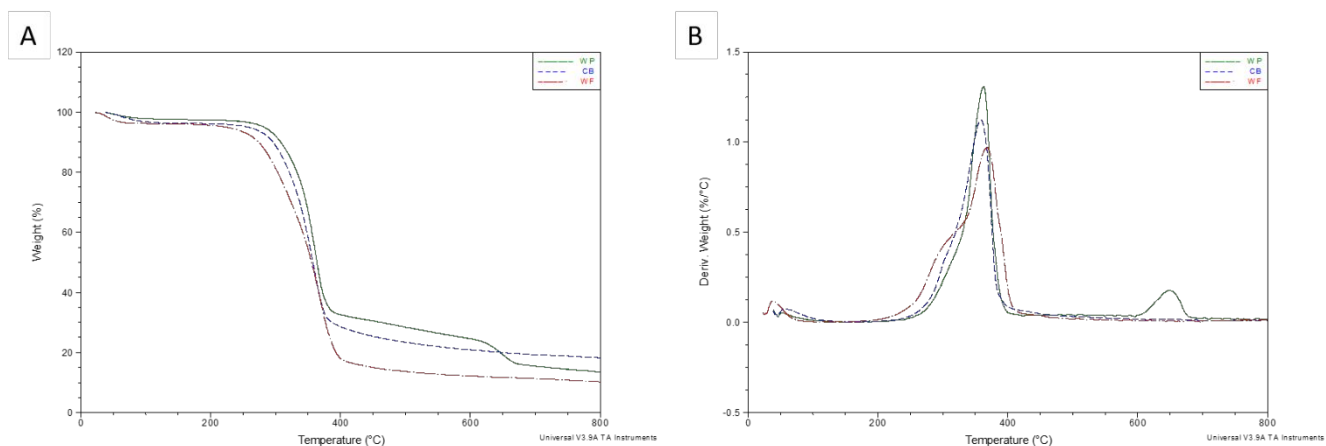

Figure S6. TGA of cellulose fillers (A) Weight loss, (B) Derivative weight. Green curve = paper, blue curve = cardboard, red curve = wood flour.

Table S1. TGA weight percent remaining

| Sample     | TGA*<br>(Wt. % at 500 °C) | TGA*<br>( Expected Wt. % at 500 °C) |
|------------|---------------------------|-------------------------------------|
| rPP        | -----                     | -----                               |
| rPP 5% WP  | 0.5                       | 1.4                                 |
| rPP 10% WP | 0.9                       | 2.8                                 |
| rPP 20% WP | 2.5                       | 5.7                                 |
| rPP 5% CB  | 4.9                       | 1.2                                 |
| rPP 10% CB | 11.5                      | 2.3                                 |

|            |       |       |
|------------|-------|-------|
| rPP 20% CB | 15.6  | 4.6   |
| rPP 5% WF  | 19.4  | 0.7   |
| rPP 10% WF | 16.8  | 1.4   |
| rPP 20% WF | 16.8  | 2.7   |
| cPP        | ----- | ----- |
| cPP 5% WP  | 1.5   | 1.41  |
| cPP 10% WP | 2.7   | 2.8   |
| cPP 20% WP | 6.5   | 5.7   |
| cPP 5% CB  | 0.9   | 1.2   |
| cPP 10% CB | 2.1   | 2.3   |
| cPP 20% CB | 3.8   | 4.6   |
| cPP 5% WF  | 1.3   | 0.7   |
| cPP 10% WF | 1.5   | 1.4   |
| cPP 20% WF | 3.5   | 2.7   |
| WP         | 28.3  | ----- |
| CB         | 23.2  | ----- |
| WF         | 13.6  | ----- |

\*controls subtracted

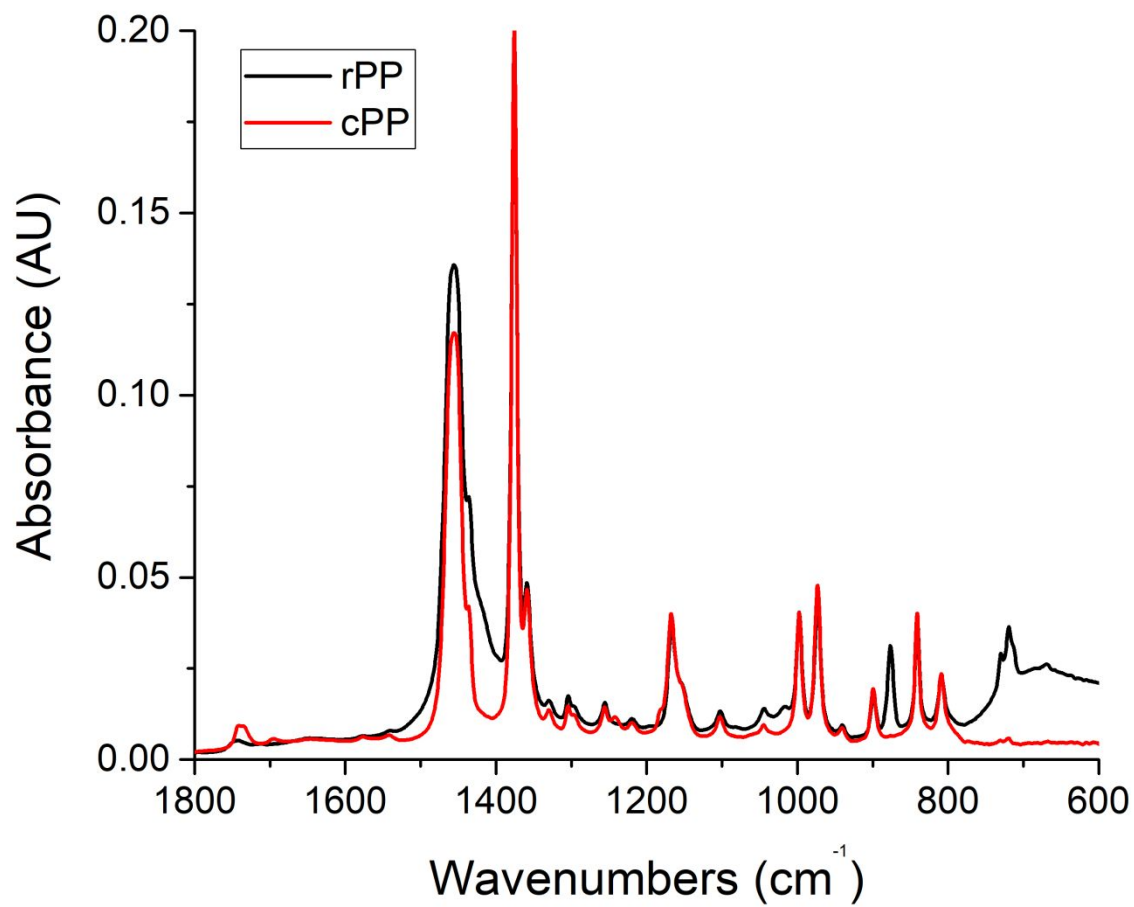

Figure S7. FTIR of rPP and cPP

Table S2. Specific Energy of rPP Composites

| Sample          | Throughput (g/hr) | Specific Energy (kJ/g) |
|-----------------|-------------------|------------------------|
| rPP/ 10 wt.% WP | 39.4              | 2.7                    |
| rPP/ 10 wt.% CB | 39.2              | 2.8                    |
| rPP/ 10 wt.% WF | 39.5              | 2.7                    |

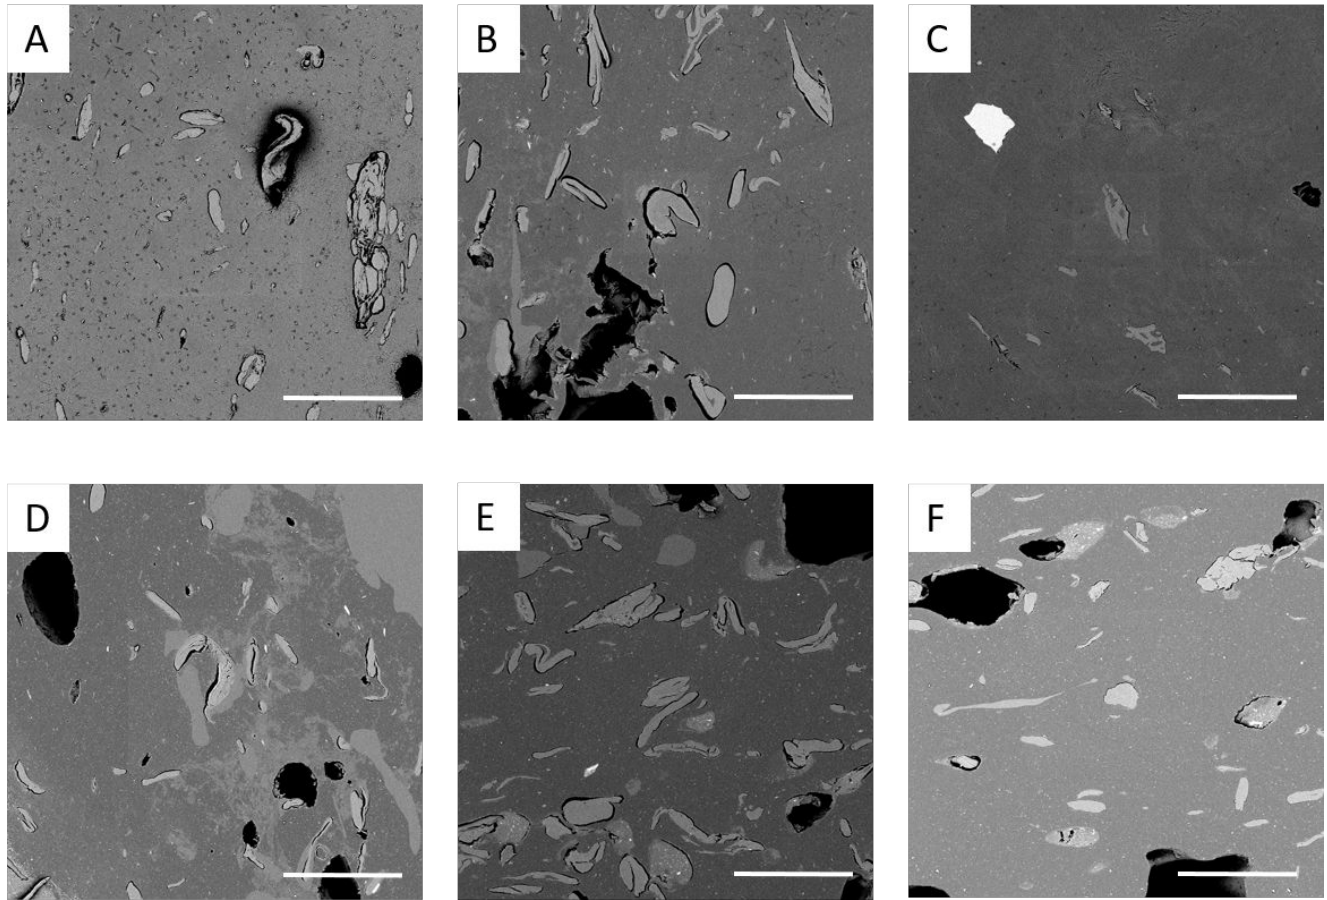

Figure S8. SEM images of polished PP/cellulose fracture surfaces (A) cPP 10% WP, (B) cPP 10 wt. % CB, (C) cPP 10 wt. % WF, (D) rPP 10 wt. % WP, (E) rPP 10 wt. % CB, (F) rPP 10 wt. % WF. Scale bar denotes 80  $\mu\text{m}$ .
